# Supplementary material for: Vascular cell-adhesion molecule 1 (VCAM-1) regulates JunB-mediated IL-8/CXCL1 expression and pathological neovascularization
Source: PubMed Central journal article supplement (PMC10183029; doi:10.1038/s42003-023-04905-z), 2023-05-13

**Supplementary Figure 1: Scans of immunoblots presented in Figure 1b, 1c, 1e & 1f.**

**Figure 1b**

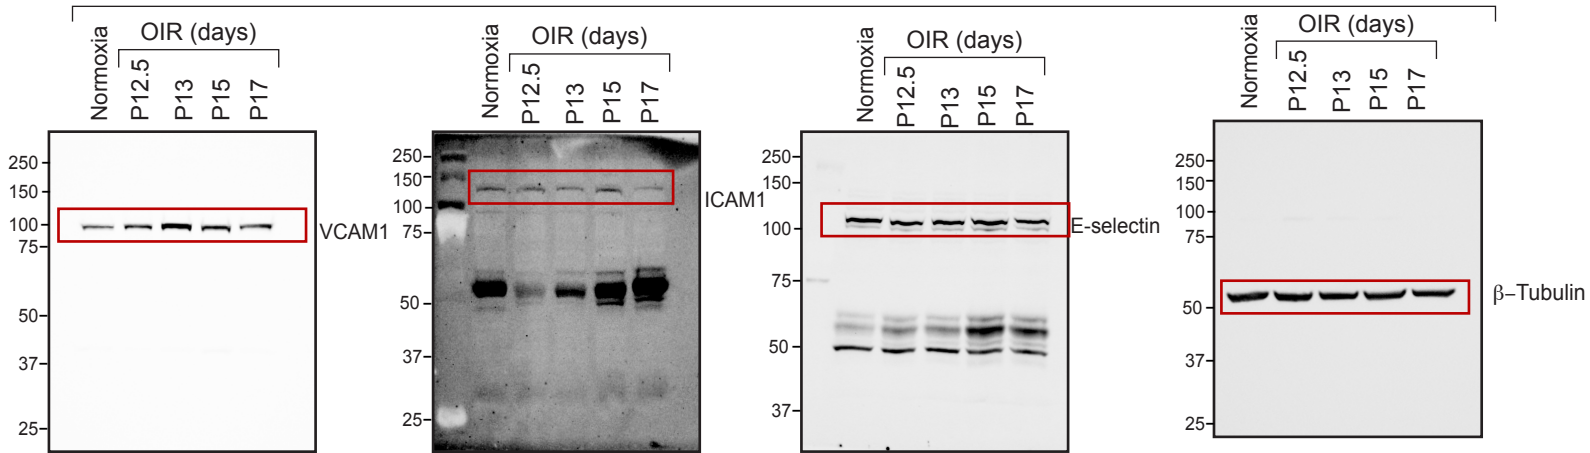

**Figure 1c**

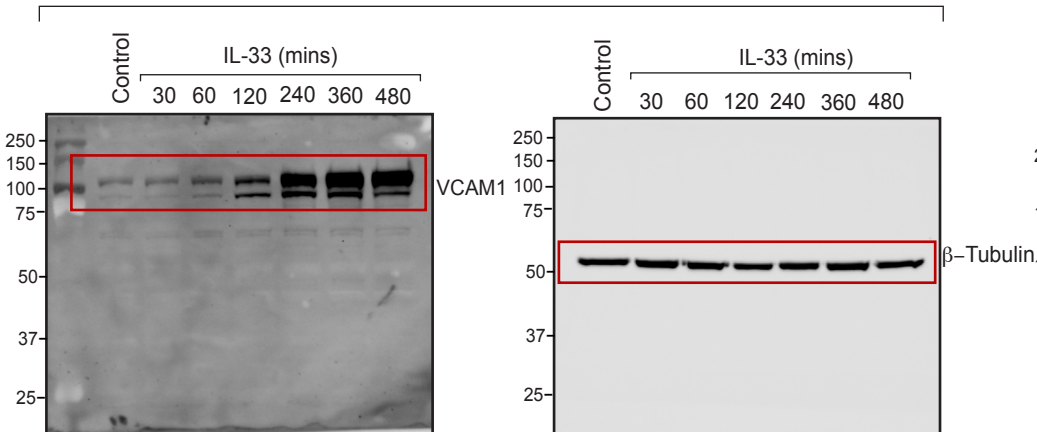

**Figure 1e**

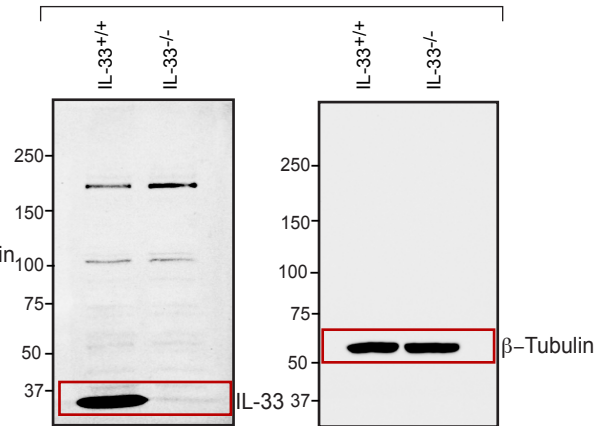

**Figure 1f**

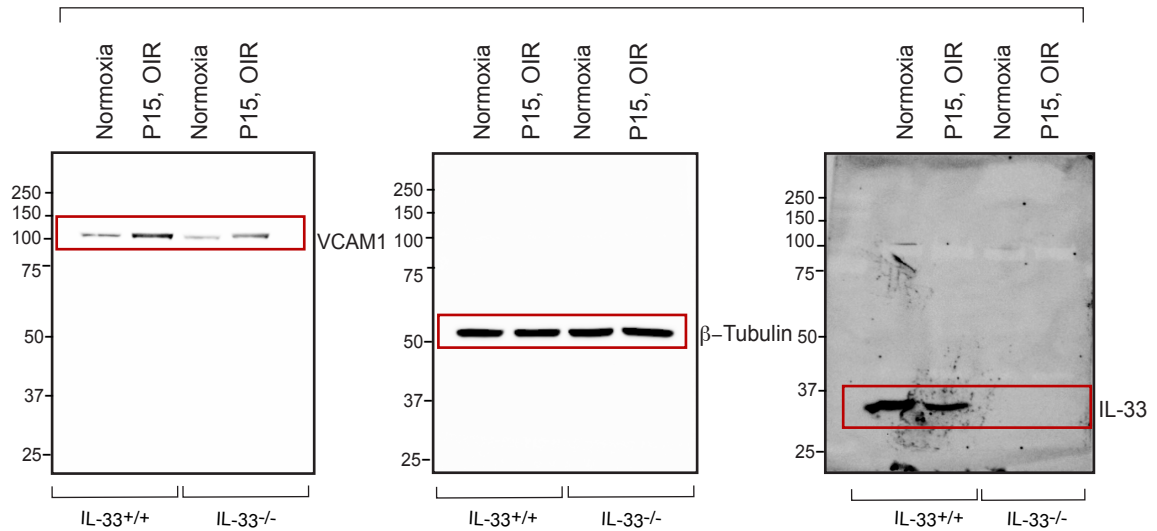

Supplementary Figure 2: Scans of immunoblots presented in Figure 1g

Figure 1g

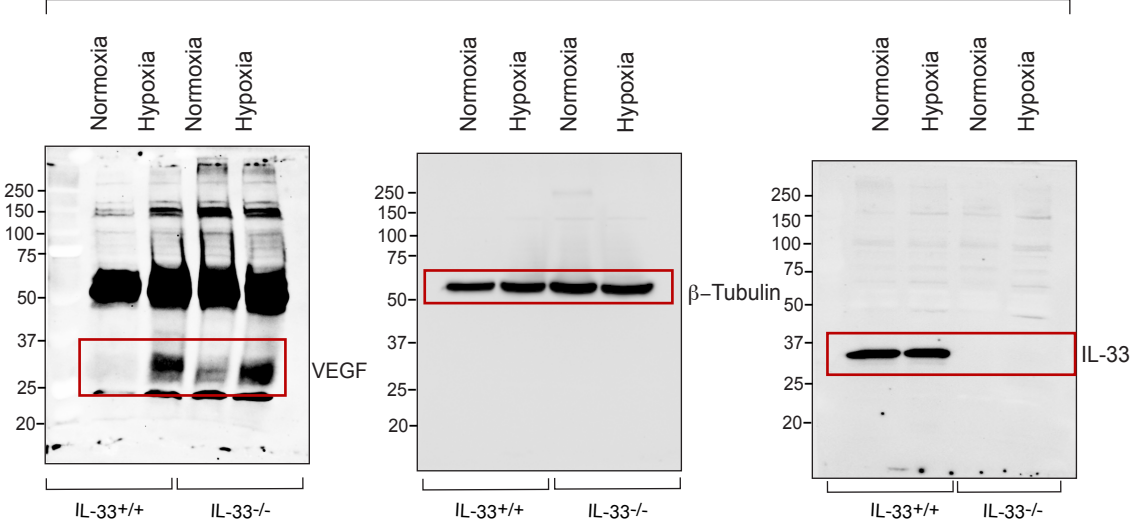

**Supplementary Figure 3: Scans of immunoblots presented in Figure 2a & 2f.**

**Figure 2a**

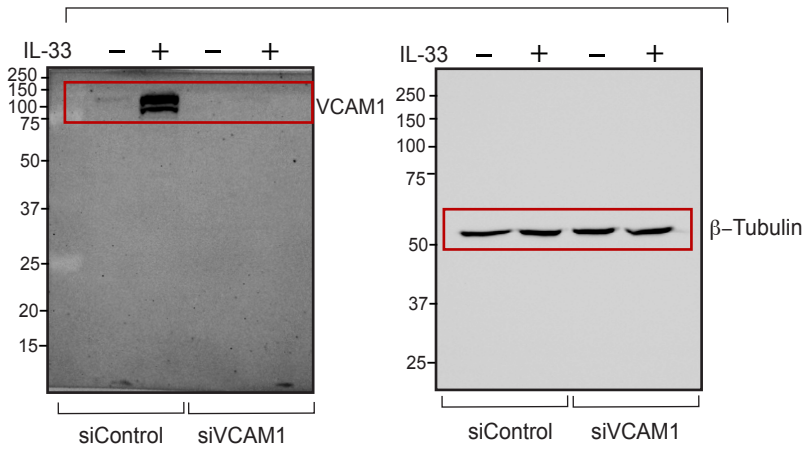

**Figure 2f**

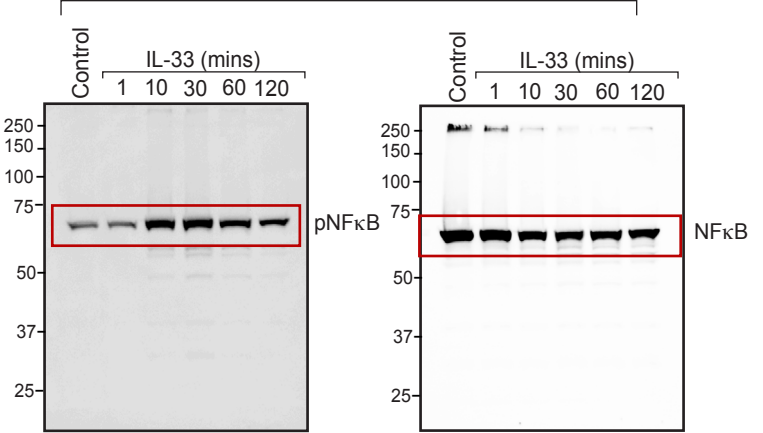

**Figure 2f**

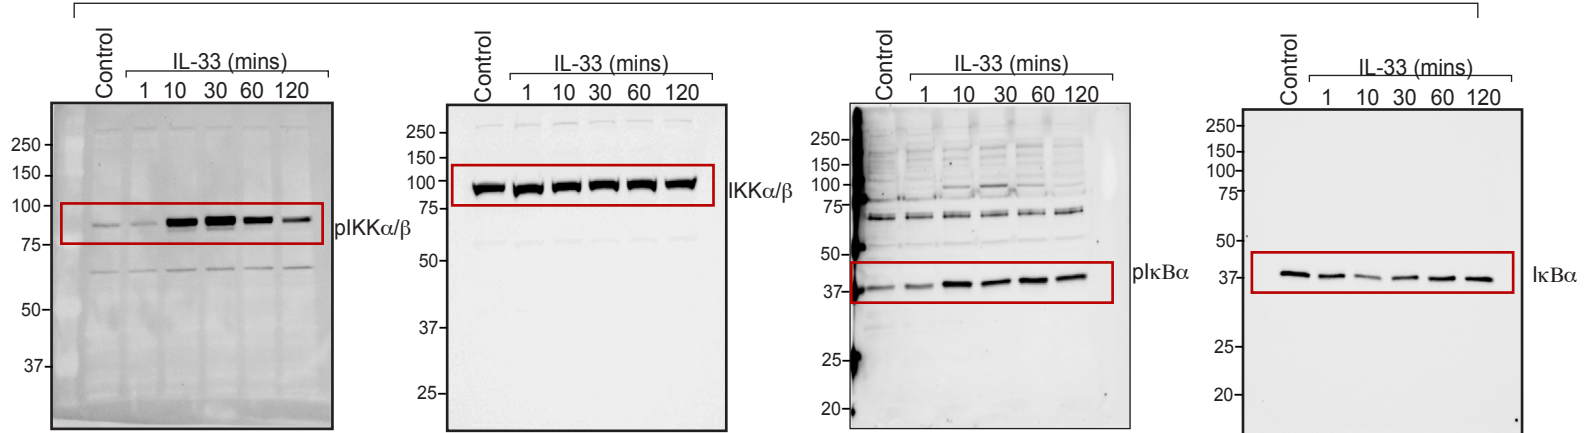

**Figure 2f**

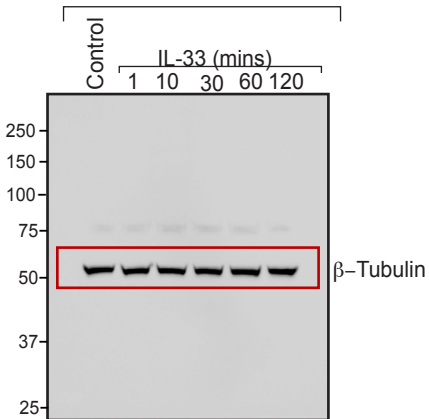

**Supplementary Figure 4: Scans of immunoblots presented in Figure 2g-i, 3c & 3e.**

**Figure 2g**

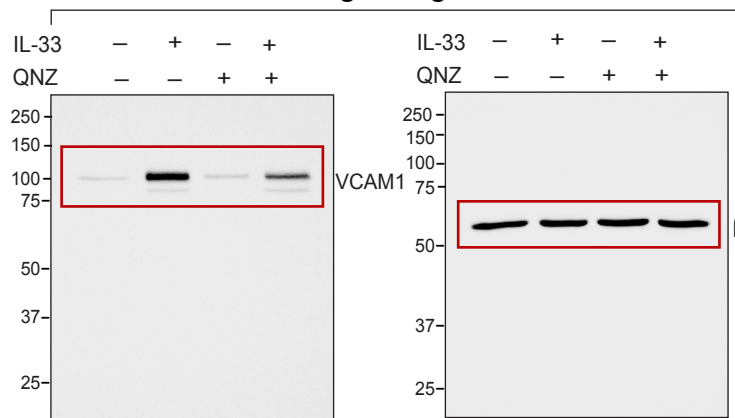

**Figure 2h**

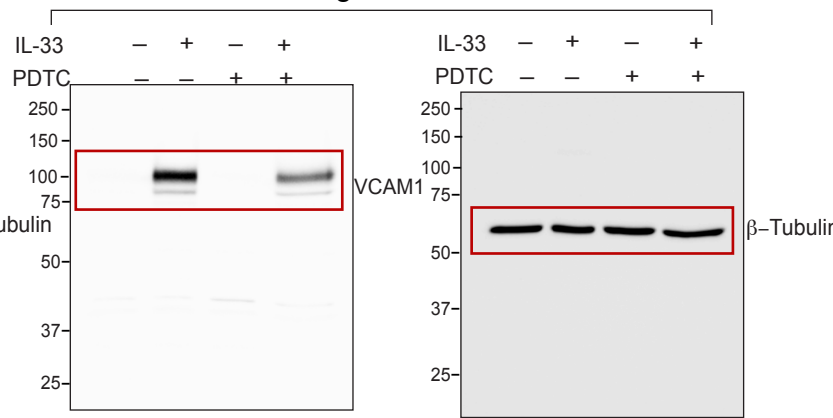

**Figure 2i**

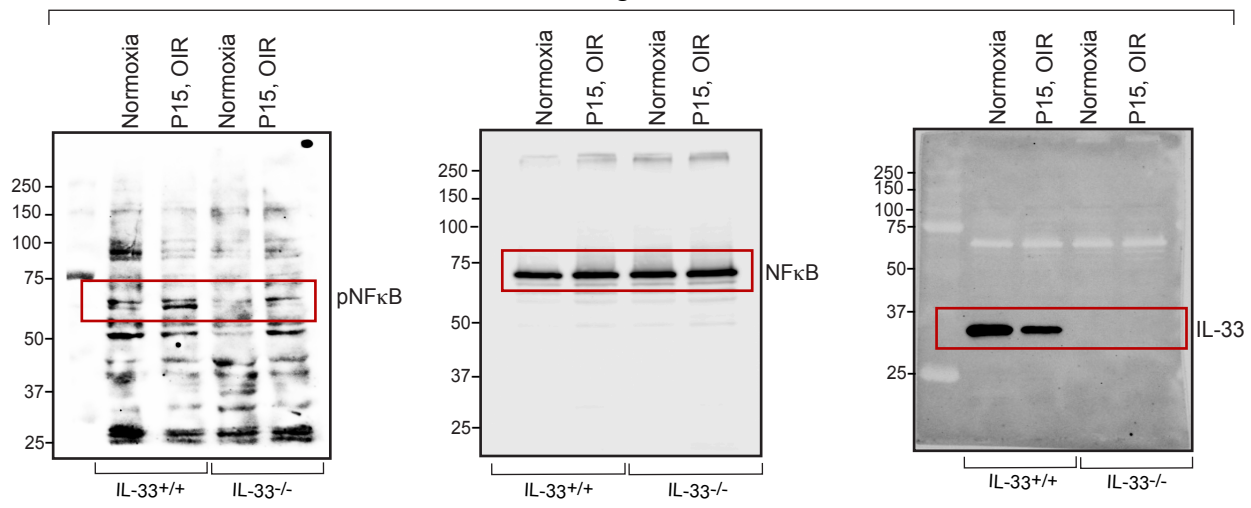

**Figure 3c**

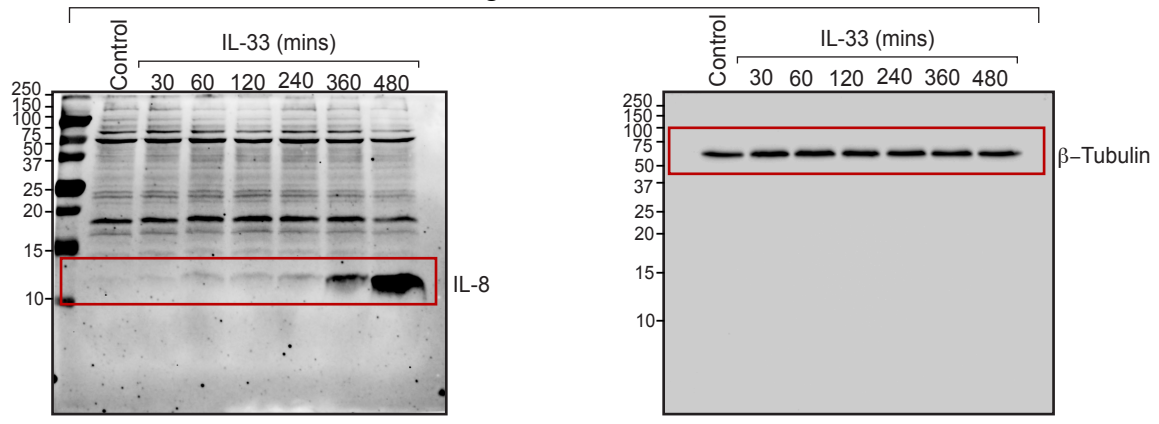

**Figure 3e**

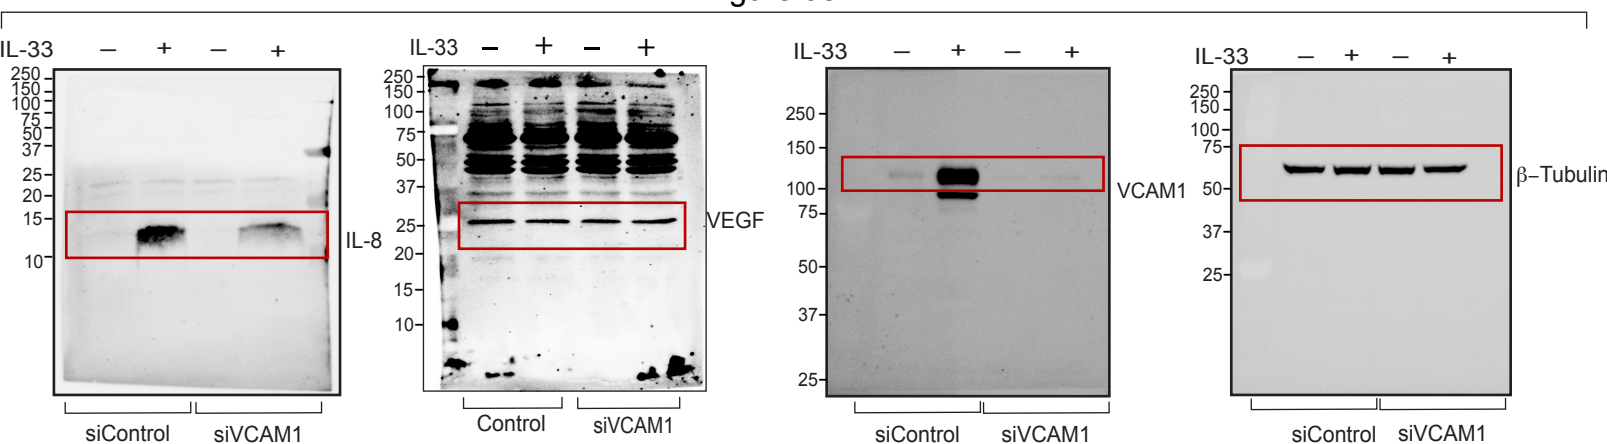

**Supplementary Figure 5: Scans of immunoblots presented in Figure 3f, 3g, 4a, & 5c.**

**Figure 3f**

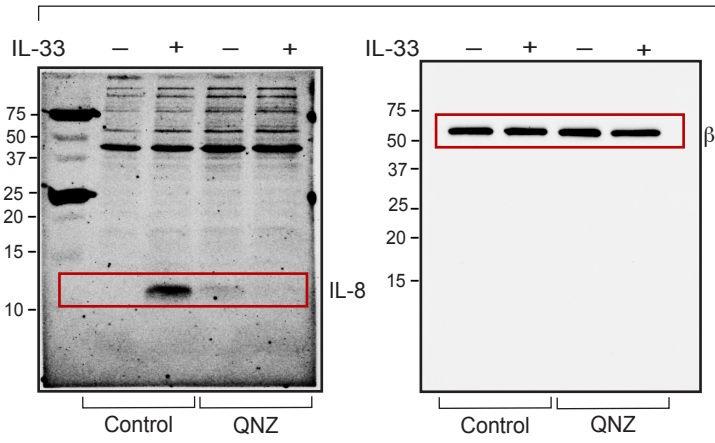

**Figure 3g**

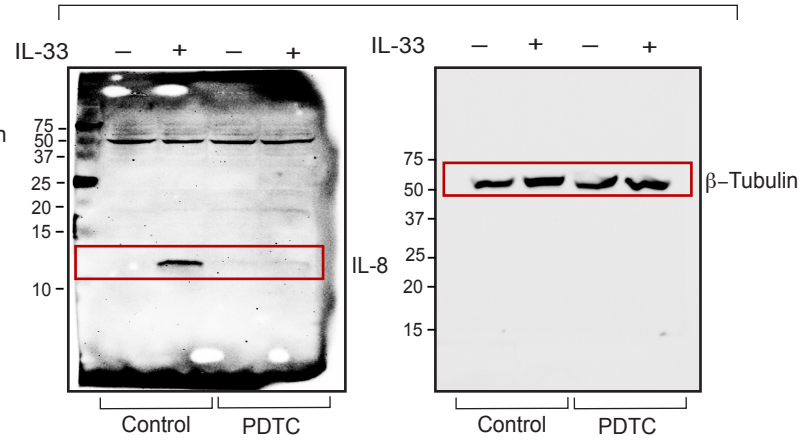

**Figure 4a**

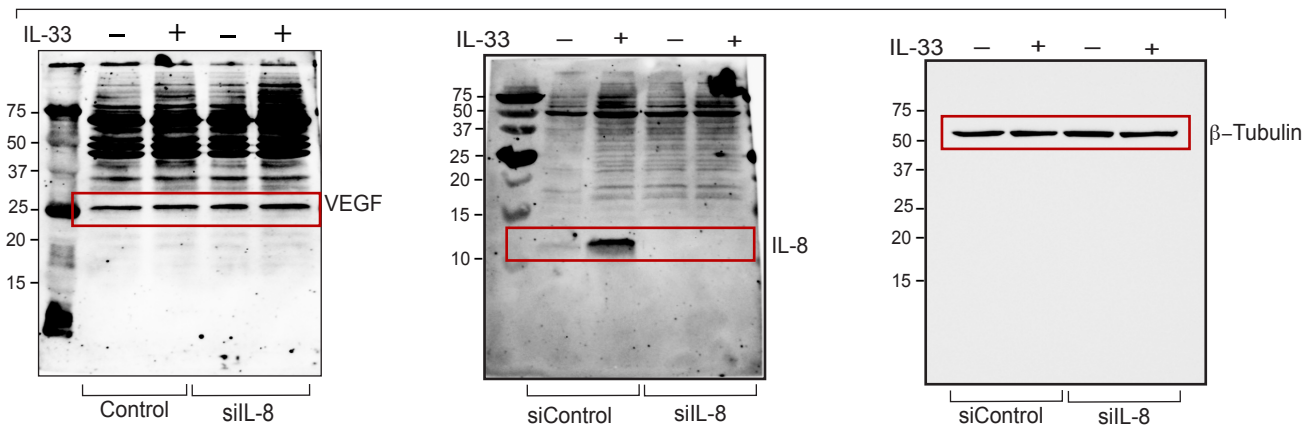

**Figure 5c**

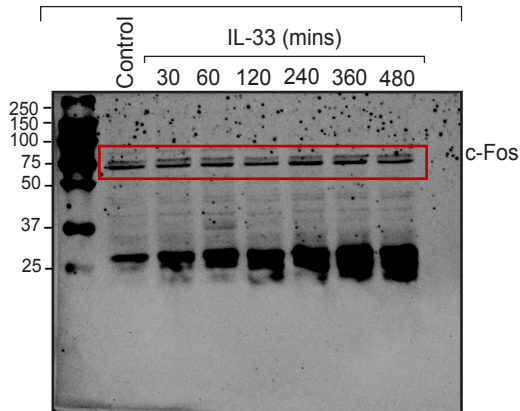

**Figure 5c**

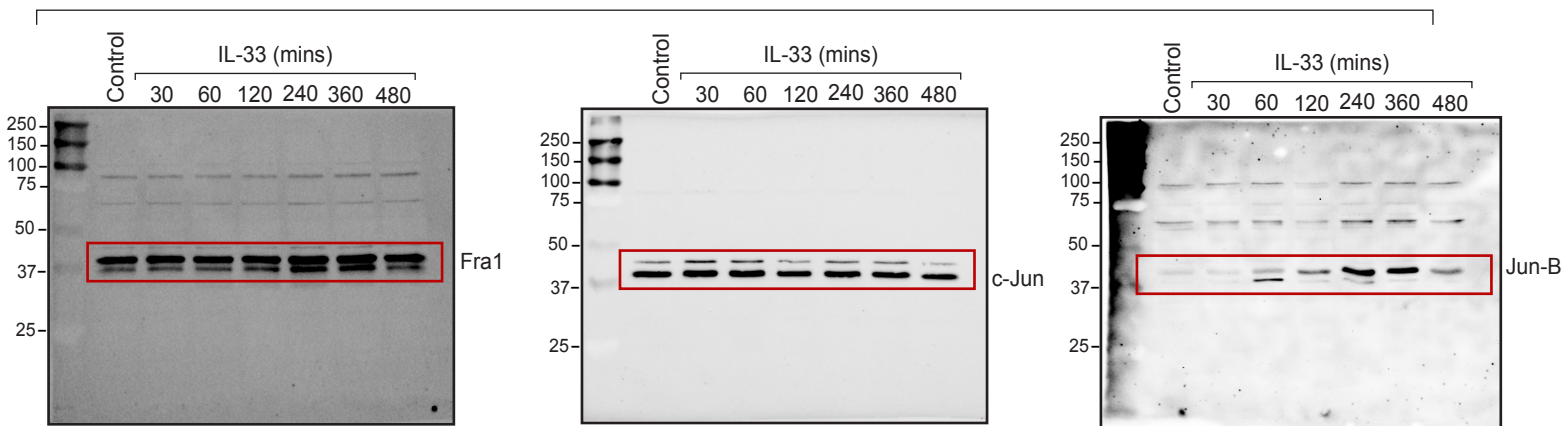

**Supplementary Figure 6: Scans of immunoblots presented in Figure 5c, 5d, & 5f.**

**Figure 5c**

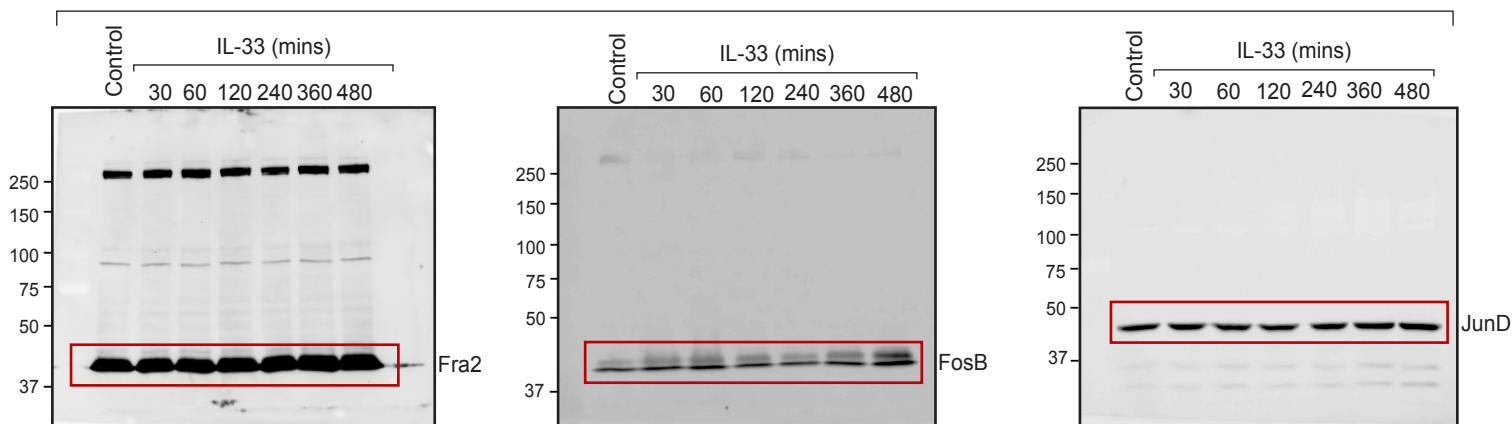

**Figure 5c**

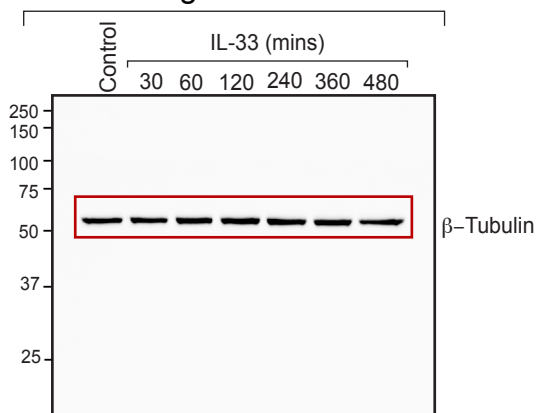

**Figure 5d**

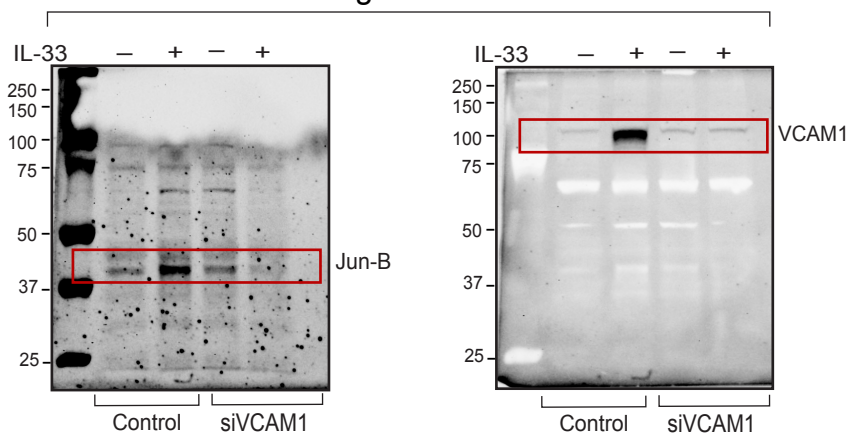

**Figure 5d**

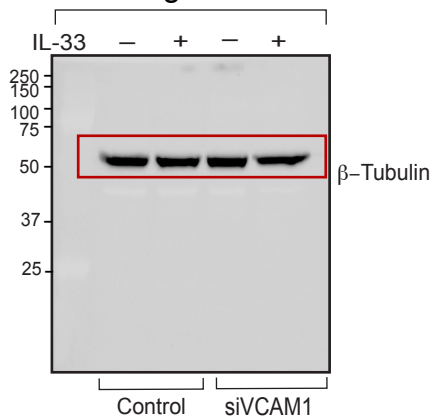

**Figure 5f**

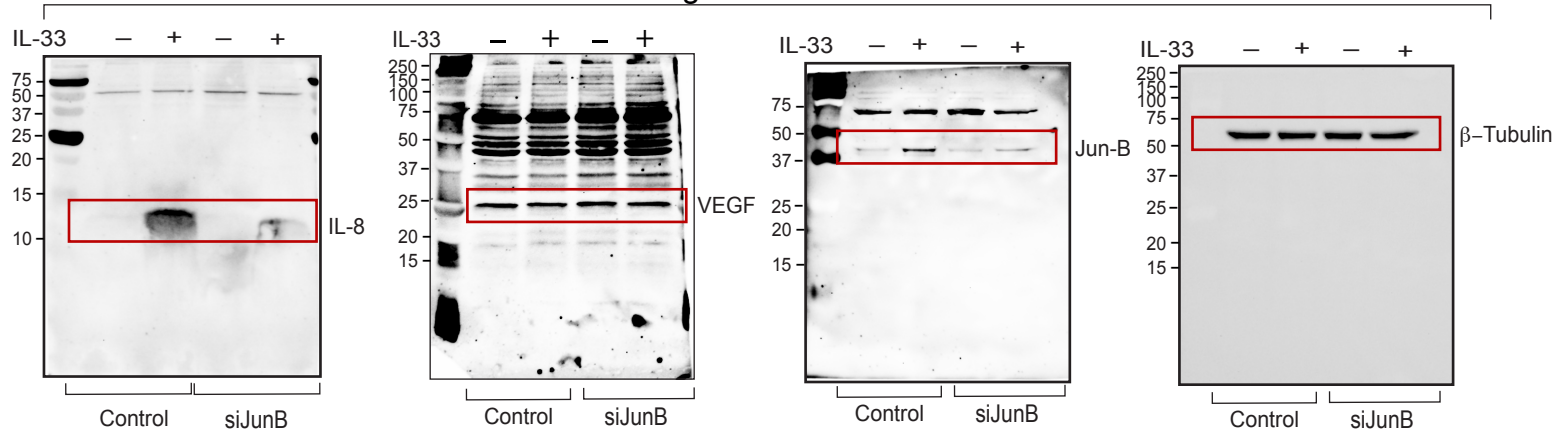

**Supplementary Figure 7: Scans of immunoblots presented in Figure 5g, 5h & 6a.**

**Figure 5g**

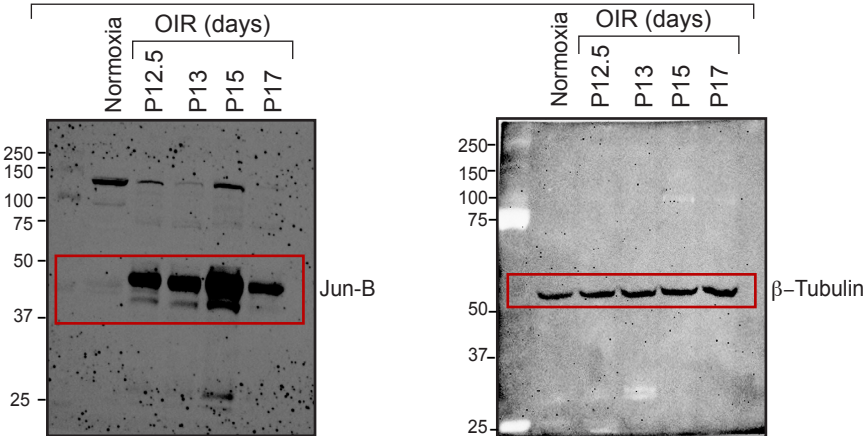

**Figure 5h**

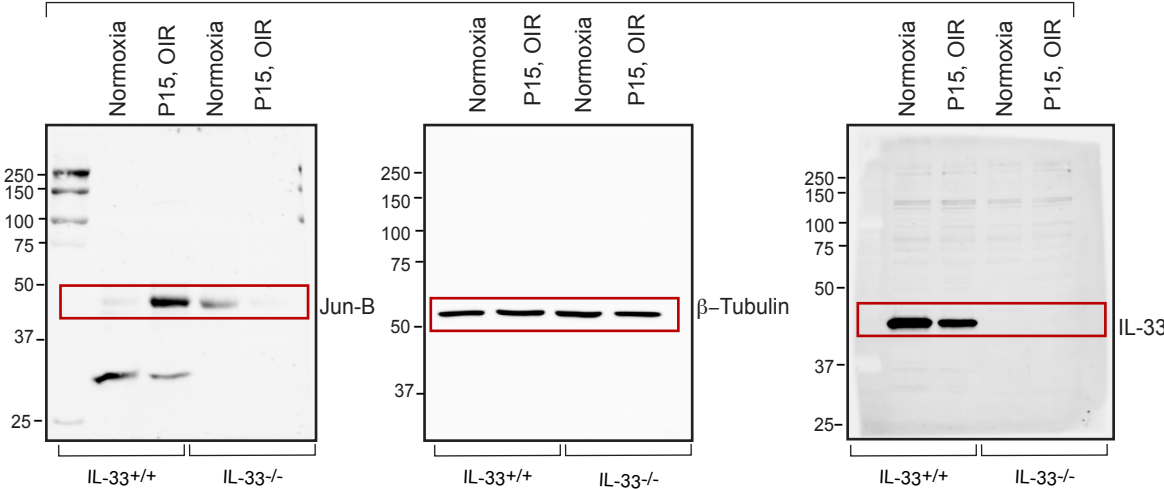

**Figure 6a**

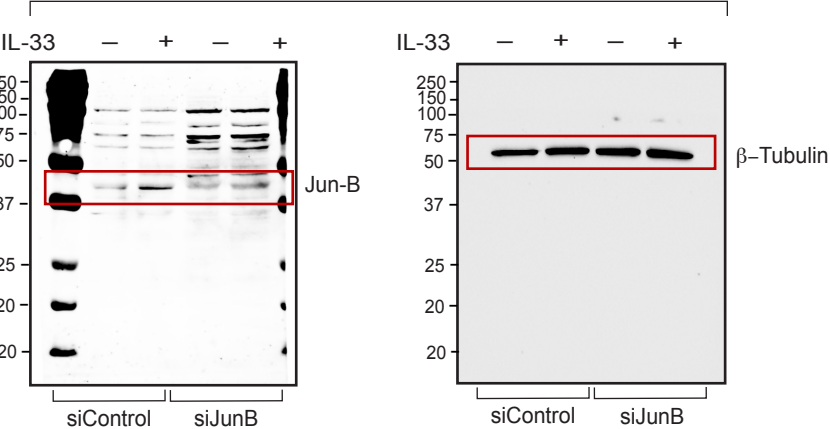

Supplementary Figure 8: Scans of immunoblots presented in Figure 8a.

Figure 8a

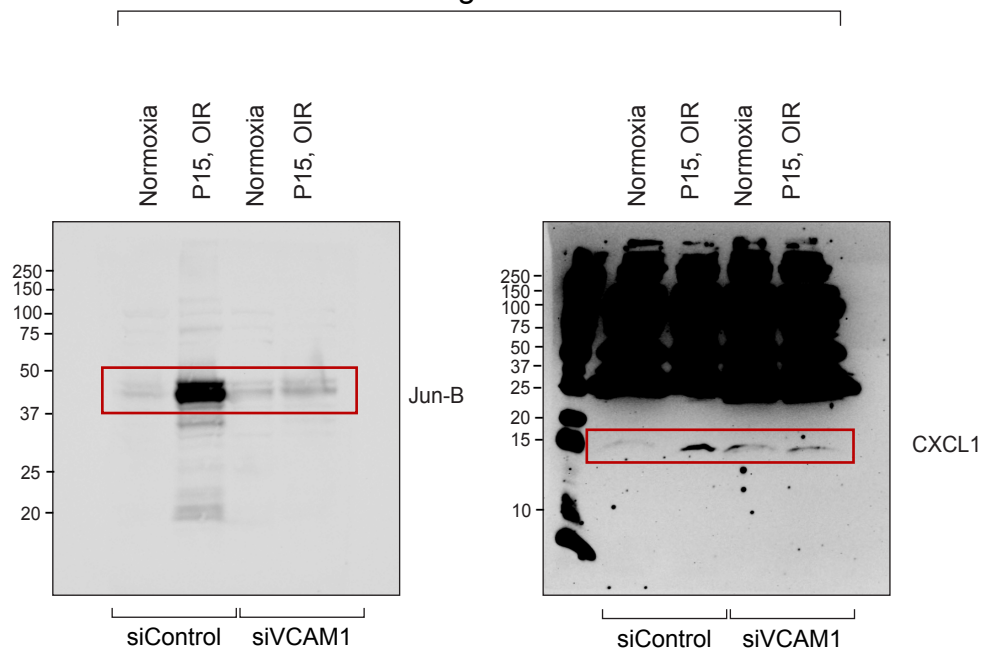

Figure 8a

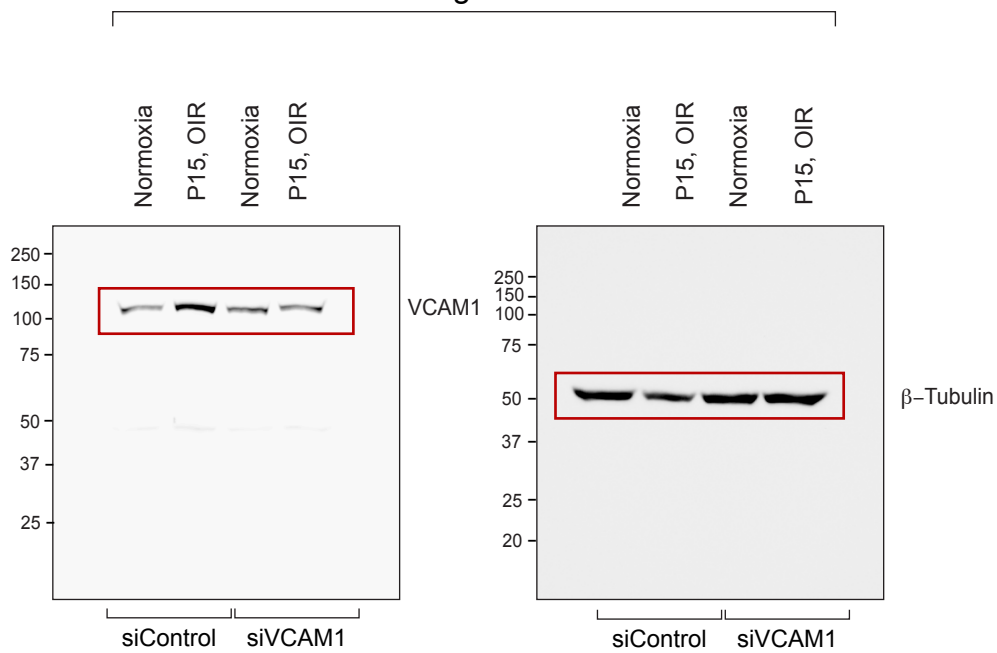

Supplement: 42003_2023_4905_MOESM2_ESM.pdf [file 42003_2023_4905_MOESM2_ESM.pdf]
