# Supplementary material for: Vascular cell-adhesion molecule 1 (VCAM-1) regulates JunB-mediated IL-8/CXCL1 expression and pathological neovascularization
Source: PubMed Central journal article supplement (PMC10183029; doi:10.1038/s42003-023-04905-z), 2023-05-13
Supplement: 42003_2023_4905_MOESM5_ESM.pdf [file 42003_2023_4905_MOESM5_ESM.pdf]

## Reporting Summary

Nature Portfolio wishes to improve the reproducibility of the work that we publish. This form provides structure for consistency and transparency in reporting. For further information on Nature Portfolio policies, see our [Editorial Policies](#) and the [Editorial Policy Checklist](#).

### Statistics

For all statistical analyses, confirm that the following items are present in the figure legend, table legend, main text, or Methods section.

n/a Confirmed

- The exact sample size ( $n$ ) for each experimental group/condition, given as a discrete number and unit of measurement
- A statement on whether measurements were taken from distinct samples or whether the same sample was measured repeatedly
- The statistical test(s) used AND whether they are one- or two-sided  
*Only common tests should be described solely by name; describe more complex techniques in the Methods section.*
- A description of all covariates tested
- A description of any assumptions or corrections, such as tests of normality and adjustment for multiple comparisons
- A full description of the statistical parameters including central tendency (e.g. means) or other basic estimates (e.g. regression coefficient) AND variation (e.g. standard deviation) or associated estimates of uncertainty (e.g. confidence intervals)
- For null hypothesis testing, the test statistic (e.g.  $F$ ,  $t$ ,  $r$ ) with confidence intervals, effect sizes, degrees of freedom and  $P$  value noted  
*Give  $P$  values as exact values whenever suitable.*
- For Bayesian analysis, information on the choice of priors and Markov chain Monte Carlo settings
- For hierarchical and complex designs, identification of the appropriate level for tests and full reporting of outcomes
- Estimates of effect sizes (e.g. Cohen's  $d$ , Pearson's  $r$ ), indicating how they were calculated

*Our web collection on [statistics for biologists](#) contains articles on many of the points above.*

### Software and code

Policy information about [availability of computer code](#)

Data collection Data was collected using NIH ImageJ version 1.53A, BD LSRII flow cytometer, NIS-Elements Advanced research software, 7300 real-time PCR system –operated SDS version 1.4, EVOS M5000 Imaging System, BIO –RAD Image Lab Software

Data analysis Data was analyzed using Prism 9 version 9.2.0 and Microsoft Excel version 16.57

For manuscripts utilizing custom algorithms or software that are central to the research but not yet described in published literature, software must be made available to editors and reviewers. We strongly encourage code deposition in a community repository (e.g. GitHub). See the Nature Portfolio [guidelines for submitting code & software](#) for further information.

### Data

Policy information about [availability of data](#)

All manuscripts must include a [data availability statement](#). This statement should provide the following information, where applicable:

- Accession codes, unique identifiers, or web links for publicly available datasets
- A description of any restrictions on data availability
- For clinical datasets or third party data, please ensure that the statement adheres to our [policy](#)

All the data presented in manuscript is available on request from authors.

## Field-specific reporting

Please select the one below that is the best fit for your research. If you are not sure, read the appropriate sections before making your selection.

Life sciences       Behavioural & social sciences       Ecological, evolutionary & environmental sciences

For a reference copy of the document with all sections, see [nature.com/documents/nr-reporting-summary-flat.pdf](https://www.nature.com/documents/nr-reporting-summary-flat.pdf)

### Life sciences study design

All studies must disclose on these points even when the disclosure is negative.

|                 |                                                                                                                                                                                                                                                                      |
|-----------------|----------------------------------------------------------------------------------------------------------------------------------------------------------------------------------------------------------------------------------------------------------------------|
| Sample size     | Sample size was calculated using standard deviation, confidence level and confidence interval.                                                                                                                                                                       |
| Data exclusions | We have not excluded any data.                                                                                                                                                                                                                                       |
| Replication     | All the in-vitro and in-vivo experiments are performed three times and we got the same results.                                                                                                                                                                      |
| Randomization   | The randomization is not relevant to our studies.                                                                                                                                                                                                                    |
| Blinding        | The investigators performing in-vivo imaging were blinded to group allocation during data collection and/or analysis. For in-vitro experiments, the blinding is not relevant as the investigators were determining the role of a particular agonist on angiogenesis. |

### Behavioural & social sciences study design

All studies must disclose on these points even when the disclosure is negative.

|                   |    |
|-------------------|----|
| Study description | NA |
| Research sample   | NA |
| Sampling strategy | NA |
| Data collection   | NA |
| Timing            | NA |
| Data exclusions   | NA |
| Non-participation | NA |
| Randomization     | NA |

### Ecological, evolutionary & environmental sciences study design

All studies must disclose on these points even when the disclosure is negative.

|                   |    |
|-------------------|----|
| Study description | NA |
| Research sample   | NA |

|                          |    |
|--------------------------|----|
| Research sample          | NA |
| Sampling strategy        | NA |
| Data collection          | NA |
| Timing and spatial scale | NA |
| Data exclusions          | NA |
| Reproducibility          | NA |
| Randomization            | NA |
| Blinding                 | NA |

Did the study involve field work?  Yes  No

## Field work, collection and transport

|                        |    |
|------------------------|----|
| Field conditions       | NA |
| Location               | NA |
| Access & import/export | NA |
| Disturbance            | NA |

## Reporting for specific materials, systems and methods

We require information from authors about some types of materials, experimental systems and methods used in many studies. Here, indicate whether each material, system or method listed is relevant to your study. If you are not sure if a list item applies to your research, read the appropriate section before selecting a response.

### Materials & experimental systems

### Methods

- n/a | Involved in the study
- Antibodies
- Eukaryotic cell lines
- Palaeontology and archaeology
- Animals and other organisms
- Human research participants
- Clinical data
- Dual use research of concern

- n/a | Involved in the study
- ChIP-seq
- Flow cytometry
- MRI-based neuroimaging

### Antibodies

|                 |                                                                                                                                               |
|-----------------|-----------------------------------------------------------------------------------------------------------------------------------------------|
| Antibodies used | <i>The antibodies used are listed at the end of this form due to space shortage.</i>                                                          |
| Validation      | <i>Validation of each primary antibody for the species and application is provided on the manufacturer's website with relevant citations.</i> |

### Eukaryotic cell lines

Policy information about [cell lines](#)

|                     |                                                                                                                           |
|---------------------|---------------------------------------------------------------------------------------------------------------------------|
| Cell line source(s) | We used Primary Human Retinal Microvascular Endothelial Cells and obtained it from Cell-Systems (ACBRI-181, Kirkland, WA) |
|---------------------|---------------------------------------------------------------------------------------------------------------------------|

|                                                                      |                                                                                        |
|----------------------------------------------------------------------|----------------------------------------------------------------------------------------|
| Authentication                                                       | <i>The authentication of primary cells is provided by Cell-Systems (Kirkland, WA).</i> |
| Mycoplasma contamination                                             | <i>The primary cells were tested negative for mycoplasma contamination.</i>            |
| Commonly misidentified lines<br>(See <a href="#">ICLAC</a> register) | NO                                                                                     |

## Palaeontology and Archaeology

|                                                                                                                                                 |    |
|-------------------------------------------------------------------------------------------------------------------------------------------------|----|
| Specimen provenance                                                                                                                             | NA |
| Specimen deposition                                                                                                                             | NA |
| Dating methods                                                                                                                                  | NA |
| <input type="checkbox"/> Tick this box to confirm that the raw and calibrated dates are available in the paper or in Supplementary Information. |    |
| Ethics oversight                                                                                                                                | NA |

Note that full information on the approval of the study protocol must also be provided in the manuscript.

## Animals and other organisms

Policy information about [studies involving animals; ARRIVE guidelines](#) recommended for reporting animal research

|                         |                                                                               |
|-------------------------|-------------------------------------------------------------------------------|
| Laboratory animals      | <i>We used C57BL6 mice, both male and female, age:12 days to 17 days old.</i> |
| Wild animals            | NO                                                                            |
| Field-collected samples | NO                                                                            |
| Ethics oversight        | IACUC committee of Wayne State University                                     |

Note that full information on the approval of the study protocol must also be provided in the manuscript.

## Human research participants

Policy information about [studies involving human research participants](#)

|                            |    |
|----------------------------|----|
| Population characteristics | NA |
| Recruitment                | NA |
| Ethics oversight           | NA |

Note that full information on the approval of the study protocol must also be provided in the manuscript.

## Clinical data

Policy information about [clinical studies](#)

All manuscripts should comply with the ICMJE [guidelines for publication of clinical research](#) and a completed [CONSORT checklist](#) must be included with all submissions.

|                             |    |
|-----------------------------|----|
| Clinical trial registration | NA |
| Study protocol              | NA |
| Data collection             | NA |
| Outcomes                    | NA |

## Dual use research of concern

Policy information about [dual use research of concern](#)

### Hazards

Could the accidental, deliberate or reckless misuse of agents or technologies generated in the work, or the application of information presented in the manuscript, pose a threat to:

- | No                                  | Yes                      |                            |
|-------------------------------------|--------------------------|----------------------------|
| <input checked="" type="checkbox"/> | <input type="checkbox"/> | Public health              |
| <input checked="" type="checkbox"/> | <input type="checkbox"/> | National security          |
| <input checked="" type="checkbox"/> | <input type="checkbox"/> | Crops and/or livestock     |
| <input checked="" type="checkbox"/> | <input type="checkbox"/> | Ecosystems                 |
| <input checked="" type="checkbox"/> | <input type="checkbox"/> | Any other significant area |

### Experiments of concern

Does the work involve any of these experiments of concern:

- | No                                  | Yes                      |                                                                             |
|-------------------------------------|--------------------------|-----------------------------------------------------------------------------|
| <input checked="" type="checkbox"/> | <input type="checkbox"/> | Demonstrate how to render a vaccine ineffective                             |
| <input checked="" type="checkbox"/> | <input type="checkbox"/> | Confer resistance to therapeutically useful antibiotics or antiviral agents |
| <input checked="" type="checkbox"/> | <input type="checkbox"/> | Enhance the virulence of a pathogen or render a nonpathogen virulent        |
| <input checked="" type="checkbox"/> | <input type="checkbox"/> | Increase transmissibility of a pathogen                                     |
| <input checked="" type="checkbox"/> | <input type="checkbox"/> | Alter the host range of a pathogen                                          |
| <input checked="" type="checkbox"/> | <input type="checkbox"/> | Enable evasion of diagnostic/detection modalities                           |
| <input checked="" type="checkbox"/> | <input type="checkbox"/> | Enable the weaponization of a biological agent or toxin                     |
| <input checked="" type="checkbox"/> | <input type="checkbox"/> | Any other potentially harmful combination of experiments and agents         |

## ChIP-seq

### Data deposition

- Confirm that both raw and final processed data have been deposited in a public database such as [GEO](#).
- Confirm that you have deposited or provided access to graph files (e.g. BED files) for the called peaks.

|                                                                    |                                 |
|--------------------------------------------------------------------|---------------------------------|
| Data access links<br><i>May remain private before publication.</i> | <input type="text" value="NA"/> |
| Files in database submission                                       | <input type="text" value="NA"/> |
| Genome browser session<br>(e.g. <a href="#">UCSC</a> )             | <input type="text" value="NA"/> |

### Methodology

|                         |                                 |
|-------------------------|---------------------------------|
| Replicates              | <input type="text" value="NA"/> |
| Sequencing depth        | <input type="text" value="NA"/> |
| Antibodies              | <input type="text" value="NA"/> |
| Peak calling parameters | <input type="text" value="NA"/> |
| Data quality            | <input type="text" value="NA"/> |
| Software                | <input type="text" value="NA"/> |

## Flow Cytometry

### Plots

Confirm that:

- The axis labels state the marker and fluorochrome used (e.g. CD4-FITC).
- The axis scales are clearly visible. Include numbers along axes only for bottom left plot of group (a 'group' is an analysis of identical markers).
- All plots are contour plots with outliers or pseudocolor plots.
- A numerical value for number of cells or percentage (with statistics) is provided.

### Methodology

Sample preparation

Instrument

Software

Cell population abundance

Gating strategy

- Tick this box to confirm that a figure exemplifying the gating strategy is provided in the Supplementary Information.

## Magnetic resonance imaging

### Experimental design

Design type

Design specifications

Behavioral performance measures

### Acquisition

Imaging type(s)

Field strength

Sequence & imaging parameters

Area of acquisition

Diffusion MRI  Used

Not used

### Preprocessing

Preprocessing software

Normalization

Normalization template

Noise and artifact removal

Volume censoring

NA

## Statistical modeling &amp; inference

Model type and settings

NA

Effect(s) tested

NA

Specify type of analysis:  Whole brain  ROI-based  Both

Statistic type for inference

(See [Eklund et al. 2016](#))

NA

Correction

## Models &amp; analysis

n/a | Involved in the study

  Functional and/or effective connectivity  Graph analysis  Multivariate modeling or predictive analysis

Functional and/or effective connectivity

NA

Graph analysis

NA

Multivariate modeling and predictive analysis

NA

## ANTIBODIES LIST

| S.No. | Antibody Name             | Catalog No. | Lot#        | Application | Dilution | Manufacturer        |
|-------|---------------------------|-------------|-------------|-------------|----------|---------------------|
| 1.    | Anti-IL-8                 | Ab235584    | GR3357096-6 | WB          | 1:1000   | Abcam               |
| 2.    | Anti-CXCL1                | Ab86436     | GR3414550-1 | WB          | 1:1000   | Abcam               |
| 3.    | Anti- VCAM-1              | 39036       | 1           | WB          | 1:1000   | Cell Signaling Inc. |
| 4.    | Anti- $\beta$ -tubulin    | 2128        | 11          | WB          | 1:1000   | Cell Signaling Inc. |
| 5.    | Anti-P-NFkB p65           | 3033        | 17          | WB          | 1:1000   | Cell Signaling Inc. |
| 6.    | Anti-NFkB                 | 8242        | 16          | WB          | 1:1000   | Cell Signaling Inc. |
| 7.    | Anti-P-IKK $\alpha/\beta$ | 2697        | 19          | WB          | 1:1000   | Cell Signaling Inc. |
| 8.    | Anti-IKK $\beta$          | 8943        | 5           | WB          | 1:1000   | Cell Signaling Inc. |
| 9.    | Anti-P-IkB $\alpha$       | 2859        | 18          | WB          | 1:1000   | Cell Signaling Inc. |
| 10.   | Anti-IkB $\alpha$         | 4814        | 17          | WB          | 1:1000   | Cell Signaling Inc. |
| 11.   | Anti-FosB                 | 2251        | 3           | WB          | 1:1000   | Cell Signaling Inc. |
| 12.   | Anti-Fra2                 | 19967       | 2           | WB          | 1:1000   | Cell Signaling Inc. |
| 13.   | JunD                      | 5000        | 1           | WB          | 1:1000   | Cell Signaling Inc. |
| 14.   | Goat anti-IL-33           | AF3626      | YJE0820111  | WB          | 1:1000   | R&D Systems         |
| 15.   | Anti-VCAM1                | Sc-13160    | A2721       | WB          | 1:500    | Santa Cruz Biotech  |
| 16.   | Anti- ICAM1               | Sc-8439     | D2621       | WB          | 1:500    | Santa Cruz Biotech  |
| 17.   | Anti-Jun-B                | Sc-8051     | D0821       | WB          | 1:500    | Santa Cruz Biotech  |
| 18.   | Anti-Fra1                 | Sc-28310    | G2921       | WB          | 1:500    | Santa Cruz Biotech  |
| 19.   | Anti Fos/c-Fos            | Sc-166940   | H1721       | WB          | 1:500    | Santa Cruz Biotech  |
| 20.   | Anti-c-Jun                | Sc-74543    | F1621       | WB          | 1:500    | Santa Cruz Biotech  |
| 21.   | Anti-VEGF                 | Sc-57496    | JH121       | WB          | 1:500    | Santa Cruz Biotech  |

## siRNA sequences

### 1. human siVCAM-1

sense sequence(5'->3'): GGAGUAAUUUGAUUGGGAtt

antisense sequence(5'->3'): UCCCAAUCAAAUUAACUCctt

### 2. mouse siVCAM-1

sense sequence(5'->3'): CCAUUGAAGAUACCGGGAAtt

antisense sequence(5'->3'): UCCCCGGUAUCUCAAUGGtg

### 3. Human siJunB

sense sequence(5'->3'): CUCUCUACACGACUACAAAtt

antisense sequence(5'->3'): UUUGUAGUCGUGUAGAGAGag

### 4. Human siIL-8

sense sequence(5'->3'): GAACUUAGAUGUCAGUGCAtt

antisense sequence(5'->3'): UGCACUGACAUCUAAGUUCtt

## Primers used for IL-8 Promoter cloning

forward: 5'- TACGGGGTACCCACCAAATTGTGGAGCTTCAG -3'

reverse: 5'- CGTCAGCTAGCGCTTACCTTCACACAGAGC-3'

**Cell Culture:** The HRMVECs were purchased from Applied Cell Biology Research Institute (ACBRI 181, Kirkland, WA).
